# Supplementary material
Source: Springer Nature journal article supplement (https://www.springermedizin.de/resource/supplementary/12914_2011_200_MOESM1_ESM.pdf/9537102)
Supplement: MOESM1 [file 9537102]

- Denial of inheritance
- Exclusion from family gatherings
- Pressure to marry
- Fear of Disclosure

Household

Public Life

- Schools: Denied admission, name calling, coerced sexual activity
- Work: Lower salaries, name calling
- Public places : Teased on microbuses, banks, airports & public restrooms.
- Negative Media images

Healthcare

Police/Legal

- Name calling, laughing, negative attitudes & lack of respect by HCWs
- Denied admission
- Double discrimination of PLWHA

- POLICE- Police torture and rape; arbitrary arrest & detention for carrying condoms
- LEGAL- Lack of citizenship laws & property rights

Circle of Human Rights Violations among  
MSM in Nepal-Project METRA
